# Supplementary figures and images for: A novel mechanism for ERK-dependent regulation of IL4 transcription during human Th2-cell differentiation
Source: PubMed Central journal article supplement — Immunol Cell Biol. 2011 Oct 11;90(7):676–87. doi: 10.1038/icb.2011.87 (PMC3419974; doi:10.1038/icb.2011.87), 2011-10-11

# Supplementary Figure 1

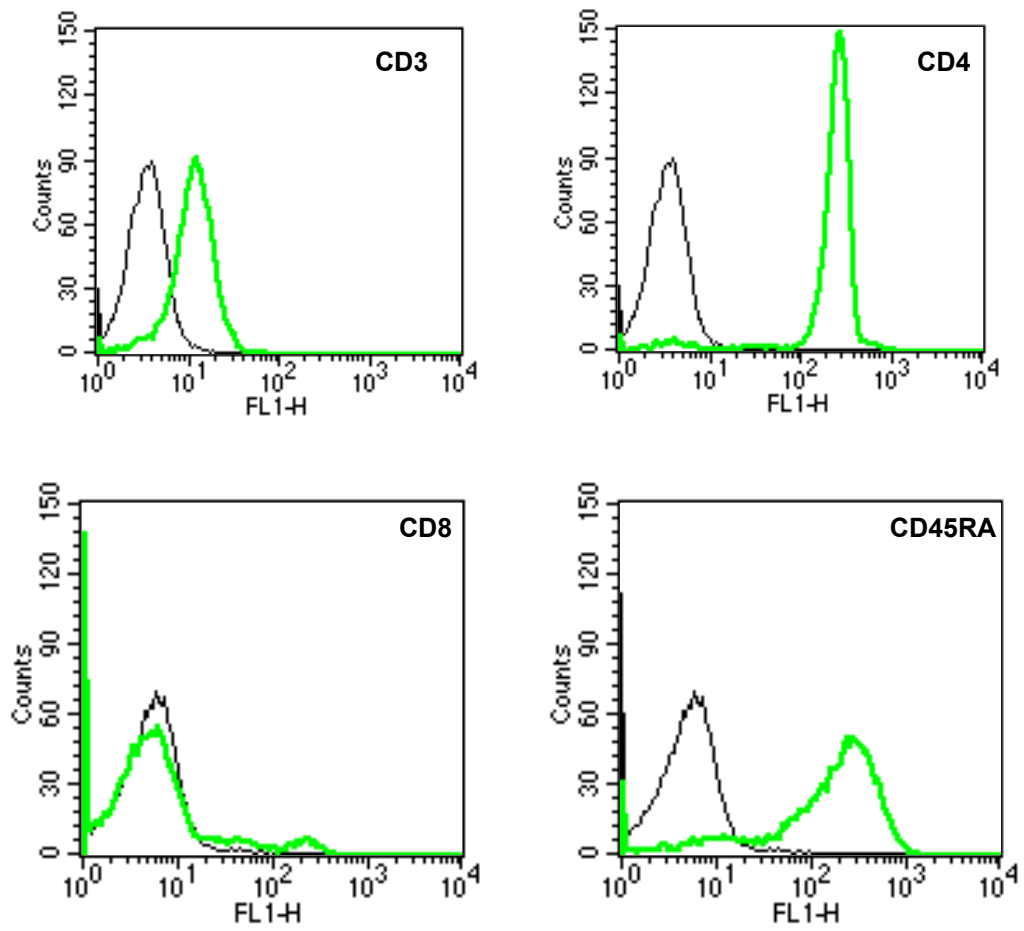

Supplement: icb201187x1.pdf [file icb201187x1.pdf]

# Supplementary Figure 2

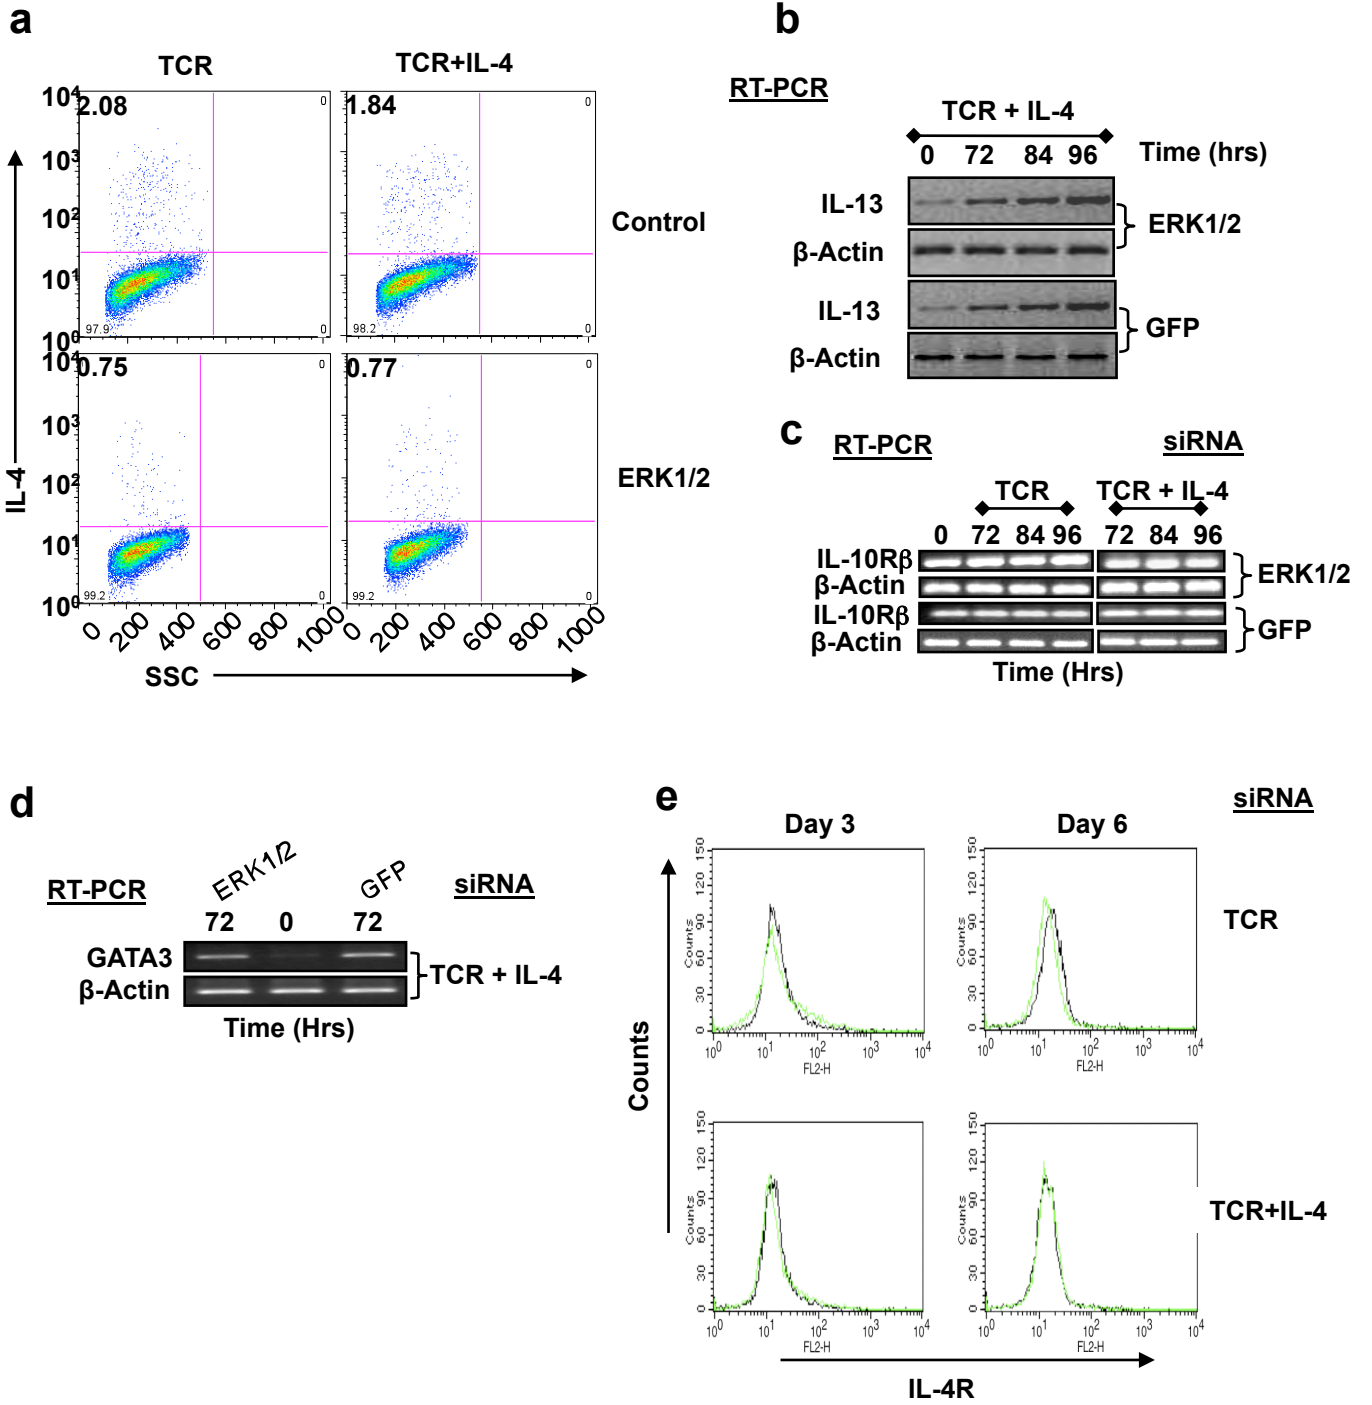

Supplement: icb201187x2.pdf [file icb201187x2.pdf]

### Supplementary Figure 3

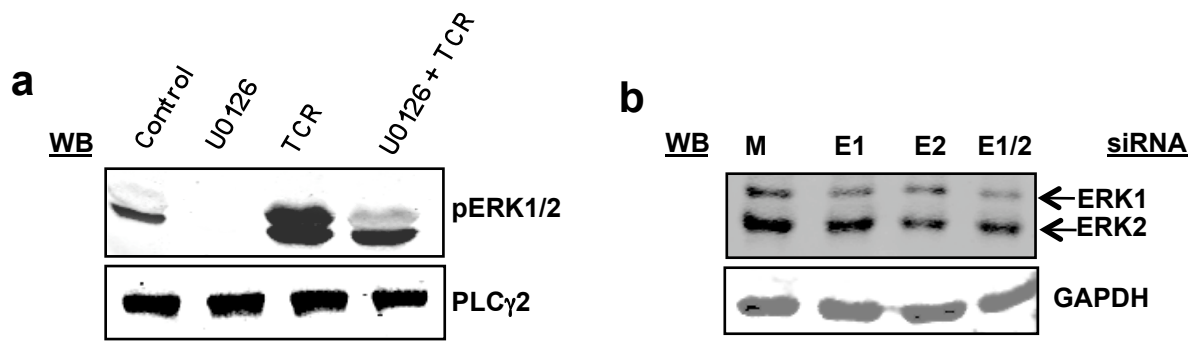

Supplement: icb201187x3.pdf [file icb201187x3.pdf]

# Supplementary Figure 4

**a**

WB

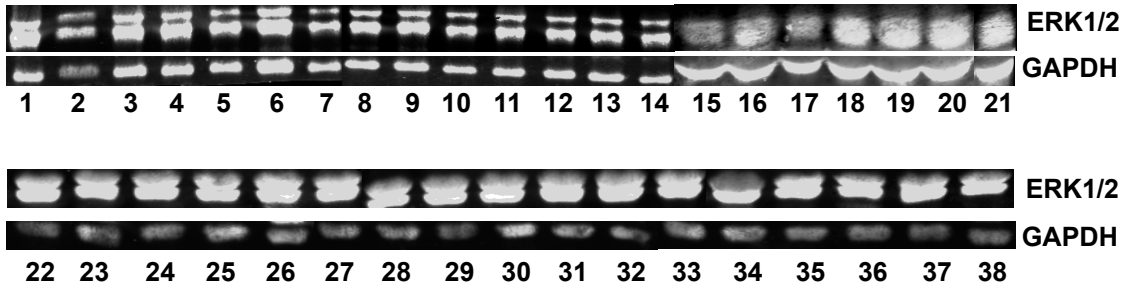

**b**

WB

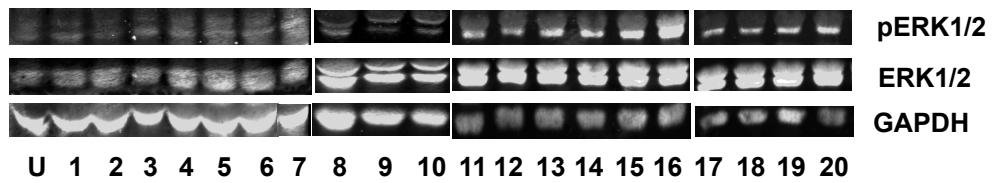

Supplement: icb201187x4.pdf [file icb201187x4.pdf]
